# Supplementary material
Source: publisher figshare collection journal article supplement (https://acs.figshare.com/ndownloader/files/16224143)
Supplement: Supplementary file 1 [file 16224143]

# **Supporting Information**

## **Ultra-Stable Water-in-Oil High Internal Phase Emulsions Featuring Interfacial and Biphasic Network Stabilization**

Michelle C. Lee<sup>1</sup>, Chen Tan<sup>1</sup>, Raheleh Ravanfar<sup>1</sup>, Alireza Abbaspourrad<sup>1\*</sup>

<sup>1</sup>Department of Food Science, Cornell University, Stocking Hall, Ithaca, NY 14853,  
USA

\*Corresponding Author: alireza@cornell.edu; +1 607 255-2923

**This file includes:**

**Figure S1.** Stability of HIPEs made from (A) only 1 wt% GMO, (B) only 3 wt% beeswax, and (C) 1 wt% GMO and 3 wt% beeswax in the oil phase stored at 25°C for one day.

**Figure S2.** Particle size distribution of O-HIPEs made with 1 wt% GMO and 3 wt% beeswax in the external phase and internal volume fractions of 0.70, 0.75, 0.80, and 0.85.

**Figure S3.** Stability of O-HIPEs made with 1 wt% GMO and 3 wt% beeswax in the external phase at internal volume fractions of 0.80 and 0.85. The samples were stored for 2 days at 25 °C.

**Figure S4.** Interfacial tension of water or 1 wt% carrageenans (internal phase) dispensed in different external phases. The interfacial tension measurements were conducted in a temperature-controlled chamber at 50 °C. All measurements are expressed in the unit of mN/m.

**Figure S5.** Interfacial tension of water (internal phase) dispensed in oil external phases composed of 1 wt% GMO and different beeswax concentration (0.5-10 wt%). The interfacial tension measurements were conducted in a temperature-controlled chamber at 50 °C. All measurements are expressed in the unit of mN/m.

**Figure S6.** (A) Visual images and (B) rheological measurement of bulk oleogel made with beeswax at different weight concentrations.

**Figure S7.** Particle size distribution of O-HIPEs made with 1 wt% GMO and beeswax concentrations of 0.5, 1, 3, 5, and 10 wt% in the external phase.

**Figure S8.** Stability of the O-HIPE made with 1 wt% GMO and 10 wt% beeswax in the oil phase at an internal volume fraction of 0.75. The sample was stored for 2 days at 25 °C.

**Figure S9.** Gel-in-gel HIPEs featuring different  $\iota$ -carrageenan concentrations. (A) Images and (B) rheological measurements of gel-in-gel HIPEs prepared with different  $\iota$ -carrageenan concentrations in the internal phase. (C) The optical microscopy showing microstructure of gel-in-gel HIPEs with different  $\iota$ -carrageenan concentrations.

**Figure S10.** Particle size distribution of gel-in-gel HIPEs made with various types of carrageenans ( $\kappa$ ,  $\iota$ ,  $\lambda$ ) in the internal phase at 1 wt% and 1 wt% GMO and 3 wt% beeswax in the external phase.

**Figure S11.** Images of the O-HIPE and gel-in-gel HIPEs made from  $\kappa$ -carrageenan ( $\kappa$ -car),  $\iota$ -carrageenan ( $\iota$ -car), and  $\lambda$ -carrageenan ( $\lambda$ -car) stored over time under vacuumed



conditions.

**Figure S12.** Images of the O-HIPE and gel-in-gel HIPEs made from  $\kappa$ -carrageenan ( $\kappa$ -car),  $\iota$ -carrageenan ( $\iota$ -car), and  $\lambda$ -carrageenan ( $\lambda$ -car) stored over time under 37 °C.

**Figure S13.** (A) Demonstration of the stability of an anthocyanin-incorporated  $\iota$ -carrageenan gel-in-gel HIPE at different pH and 25 °C. (B) Demonstration of  $\beta$ -carotene and anthocyanin co-encapsulated in the gel-in-gel HIPE after extraction using n-Hexanes.

**Figure S14.** O-HIPEs featuring different GMO concentrations in the external phase. (A) Images and (B) rheological measurements of O-HIPEs prepared with different GMO concentrations. (C) The optical microscopy showing microstructure of O-HIPEs with different GMO concentrations.

**Figure S15.** Particle size distribution of O-HIPEs made with 3 wt% beeswax and different GMO concentrations (0.5- 3%) in the external phase at internal volume fractions of 0.75.

**Figure S16.** Gel-in-gel ( $\iota$ -carrageenan) HIPEs featuring different GMO concentrations. (A) Images and (B) rheological measurements of gel-in-gel ( $\iota$ -carrageenan) HIPEs prepared with different GMO concentrations. (C) The optical microscopy showing microstructure of gel-in-gel ( $\iota$ -carrageenan) HIPEs with different GMO concentrations.

**Figure S17.** Three phase contact angle of water on 3% beeswax oleogel film immersed in either canola oil or canola oil- GMO mixture.

**Table S1.** Particle size of HIPEs stabilized by solely 1 wt% GMO, solely 3 wt% beeswax, and a combination of 1 wt% GMO + 3 wt% beeswax made at internal volume fractions of 0.75.

**Table S2.** Particle size of O-HIPEs made from different internal phase volume ratios.

**Table S3.** Particle size of O-HIPEs made from different beeswax concentrations.

**Table S4.** Particle size of gel-in-gel HIPEs made from different carrageenans in the internal phase.

**Table S5.** EDS elemental analysis of carbon, oxygen, and sulfur from the cryo-SEM.

# Figures

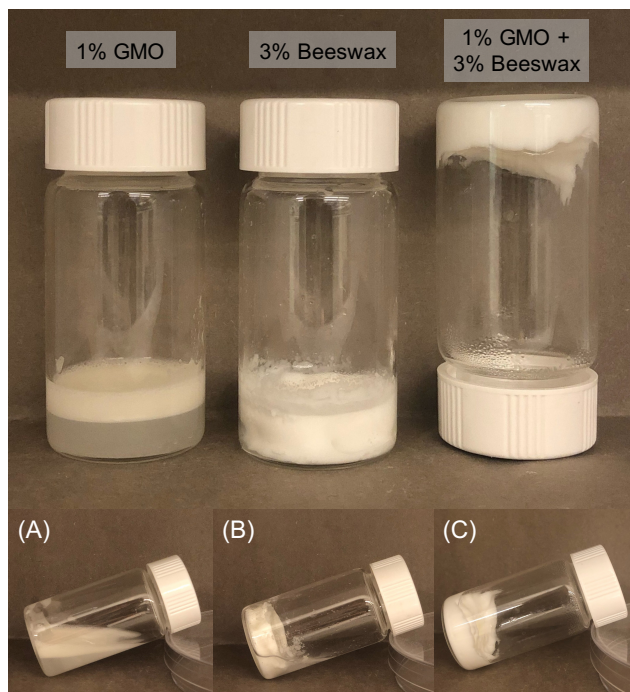

**Figure S1.** Stability of HIPEs made from (A) only 1 wt% GMO, (B) only 3 wt% beeswax, and (C) 1 wt% GMO and 3 wt% beeswax in the oil phase stored at 25°C for one day.

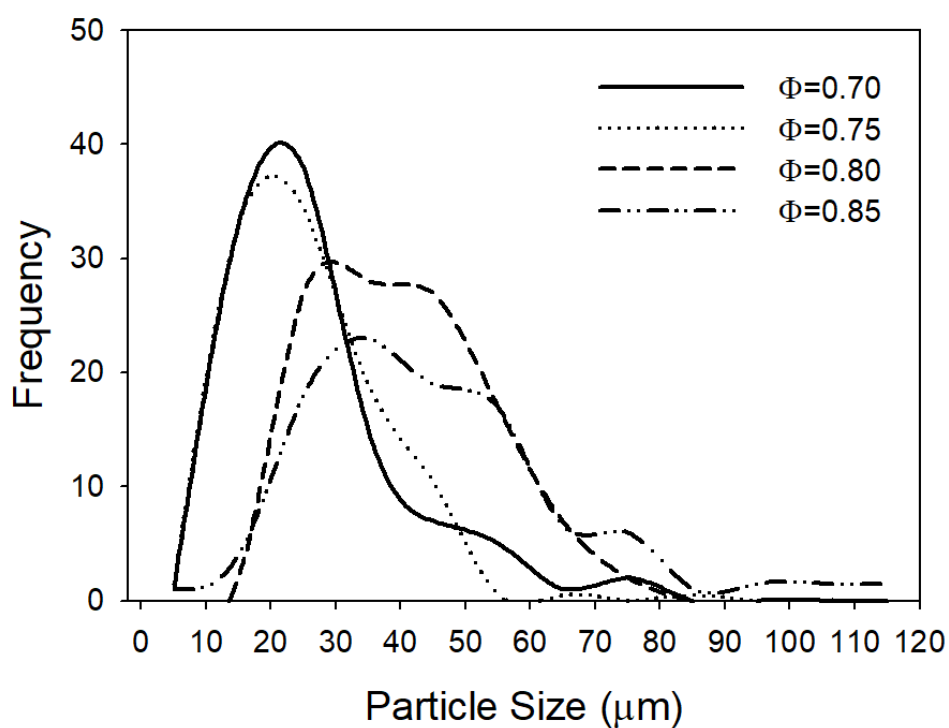

**Figure S2.** Particle size distribution of O-HIPEs made with 1 wt% GMO and 3 wt% beeswax in the external phase and internal volume fractions of 0.70, 0.75, 0.80, and 0.85.

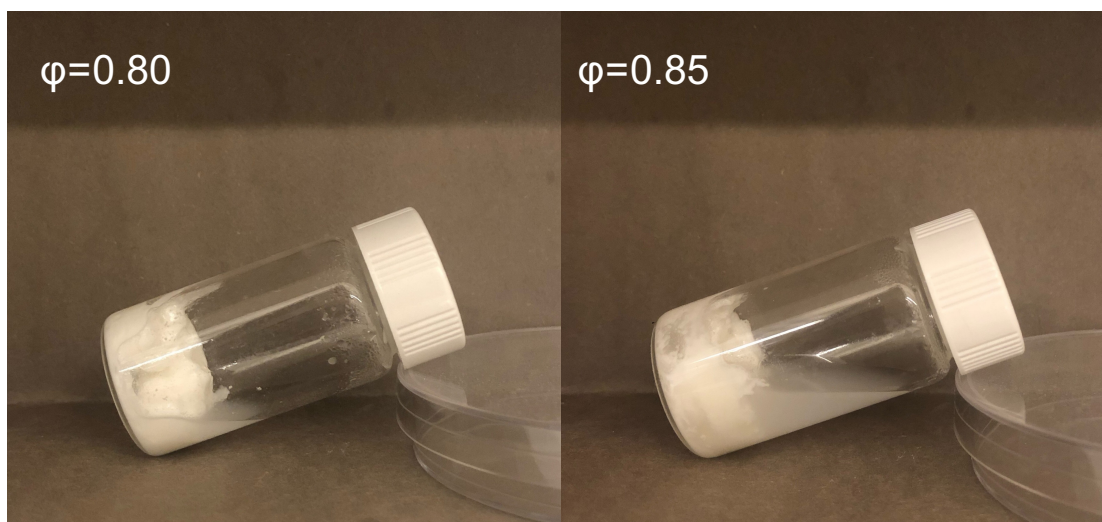

**Figure S3.** Stability of O-HIPEs made with 1 wt% GMO and 3 wt% beeswax in the external phase at internal volume fractions of 0.80 and 0.85. The samples were stored for 2 days at 25 °C.

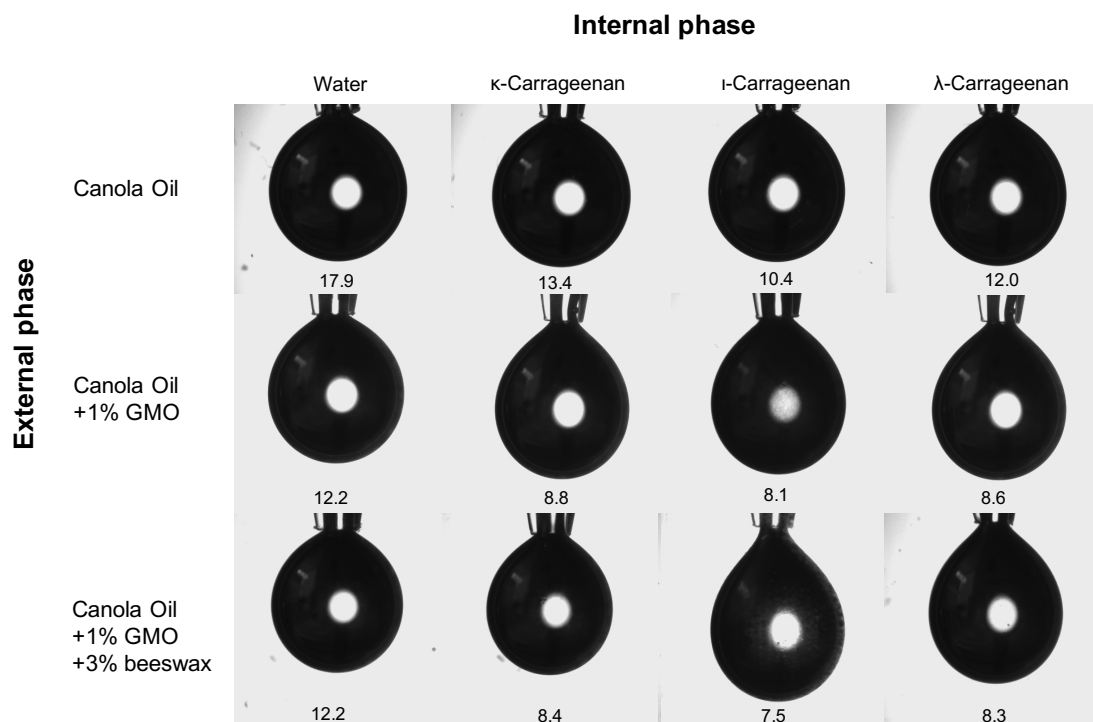

**Figure S4.** Interfacial tension of water or 1 wt% carrageenans (internal phase) dispensed in different external phases. The interfacial tension measurements were conducted in a temperature-controlled chamber at 50 °C. All measurements are expressed in the unit of mN/m.

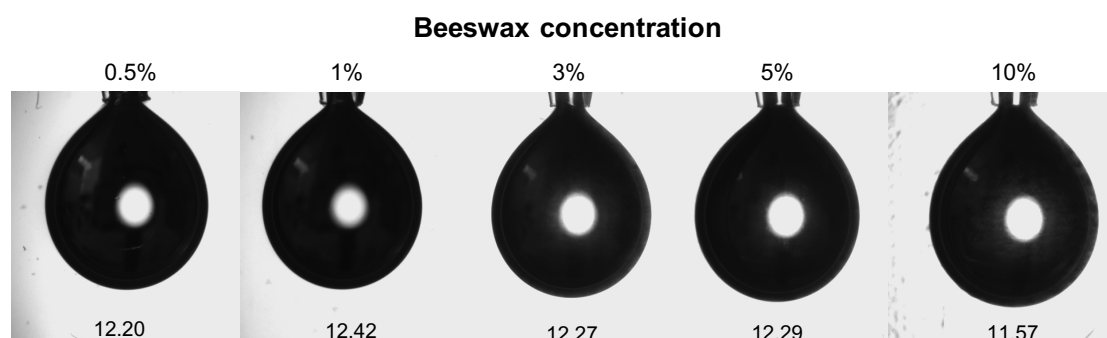

**Figure S5.** Interfacial tension of water (internal phase) dispensed in oil external phases composed of 1 wt% GMO and different beeswax concentration (0.5-10 wt%). The interfacial tension measurements were conducted in a temperature-controlled chamber at 50 °C. All measurements are expressed in the unit of mN/m.

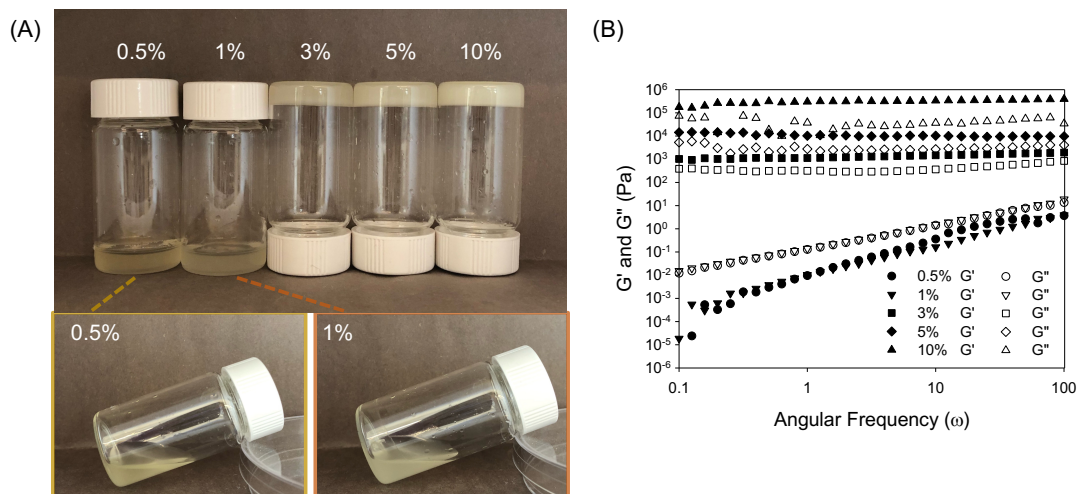

**Figure S6.** (A) Visual images and (B) rheological measurement of bulk oleogel made with beeswax at different weight concentrations.

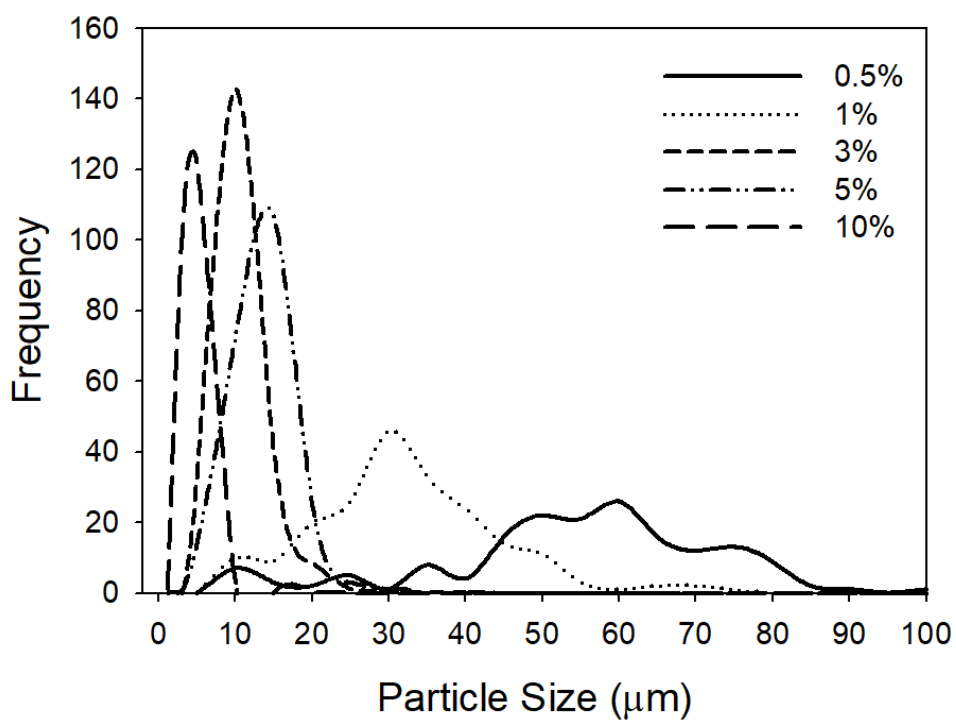

**Figure S7.** Particle size distribution of O-HIPEs made with 1 wt% GMO and beeswax concentrations of 0.5, 1, 3, 5, and 10 wt% in the external phase.

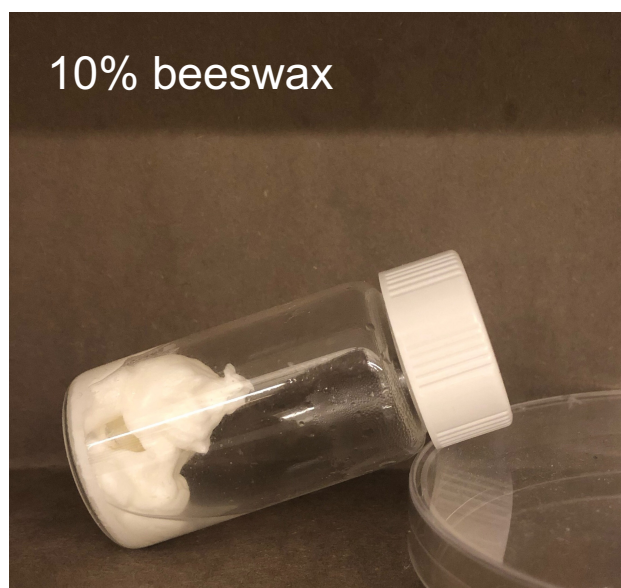

**Figure S8.** Stability of the O-HIPE made with 1 wt% GMO and 10 wt% beeswax in the oil phase at an internal volume fraction of 0.75. The sample was stored for 2 days at 25 °C.

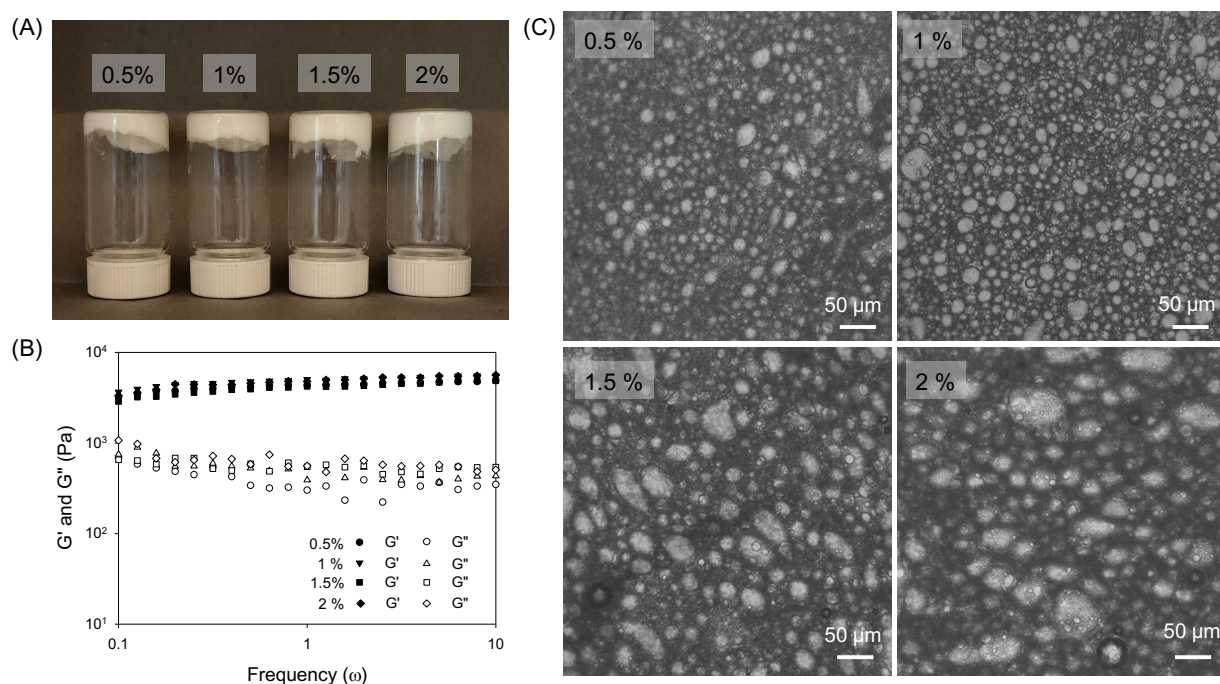

**Figure S9.** Gel-in-gel HIPEs featuring different  $\iota$ -carrageenan concentrations. (A) Images and (B) rheological measurements of gel-in-gel HIPEs prepared with different  $\iota$ -carrageenan concentrations in the internal phase. (C) The optical microscopy showing microstructure of gel-in-gel HIPEs with different  $\iota$ -carrageenan concentrations.



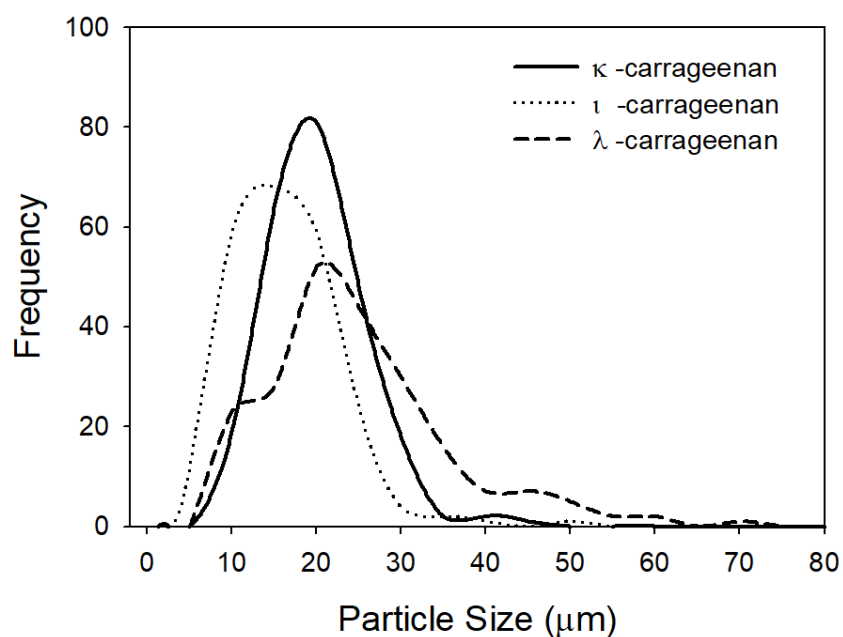

**Figure S10.** Particle size distribution of gel-in-gel HIPEs made with various types of carrageenans ( $\kappa$ ,  $\iota$ ,  $\lambda$ ) in the internal phase at 1 wt% and 1 wt% GMO and 3 wt% beeswax in the external phase.

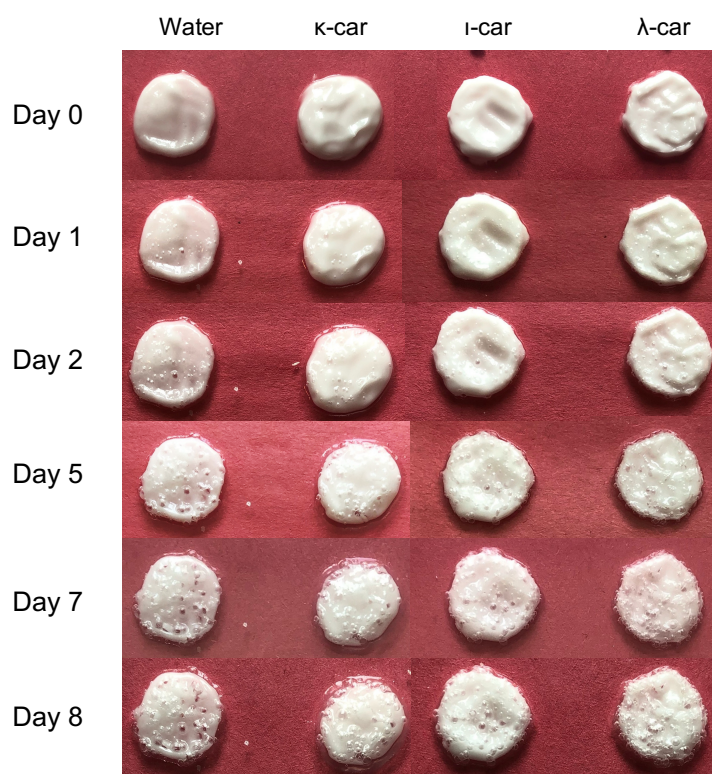

**Figure S11.** Images of the O-HIPE and gel-in-gel HIPEs made from  $\kappa$ -carrageenan ( $\kappa$ -car),  $\iota$ -carrageenan ( $\iota$ -car), and  $\lambda$ -carrageenan ( $\lambda$ -car) stored over time under vacuumed conditions.

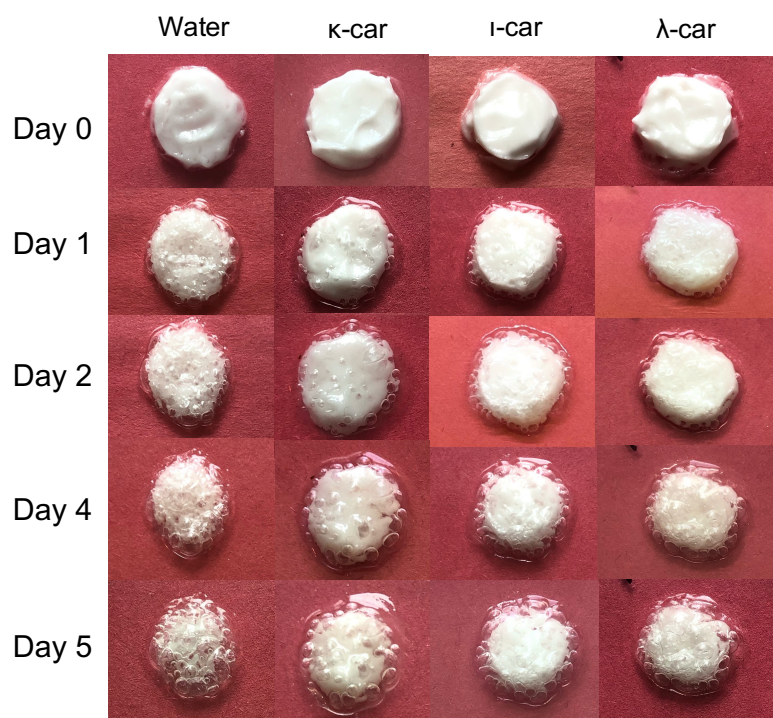

**Figure S12.** Images of the O-HIPE and gel-in-gel HIPEs made from  $\kappa$ -carrageenan ( $\kappa$ -car),  $\iota$ -carrageenan ( $\iota$ -car), and  $\lambda$ -carrageenan ( $\lambda$ -car) stored over time under 37 °C.

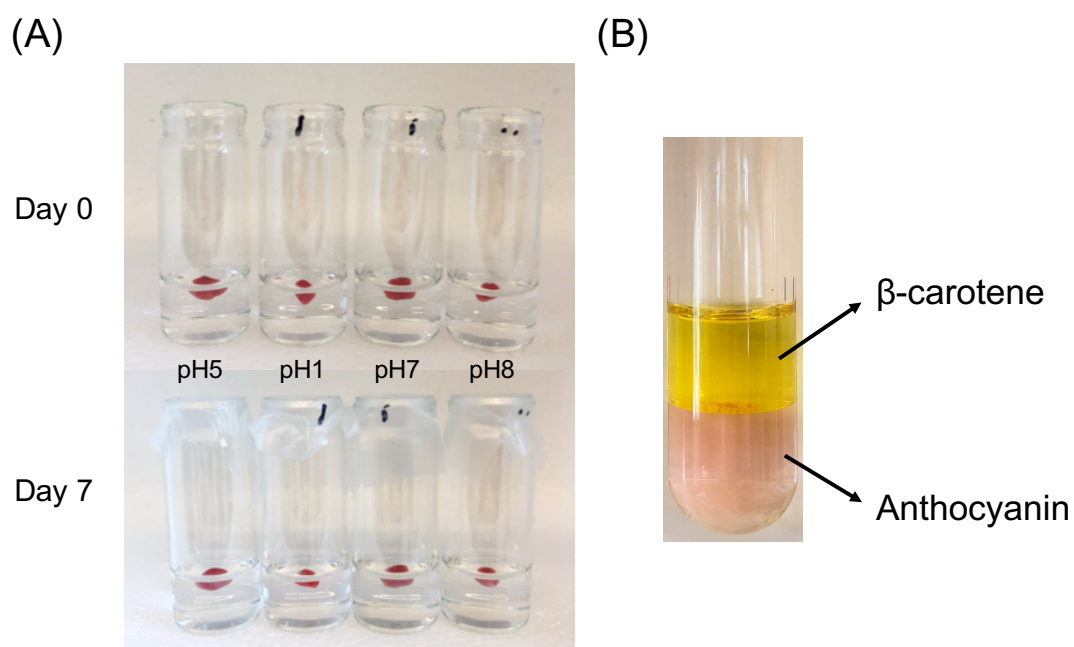

**Figure S13.** (A) Demonstration of the stability of an anthocyanin-incorporated  $\iota$ -carrageenan gel-in-gel HIPE at different pH and 25 °C. (B) Demonstration of  $\beta$ -carotene and anthocyanin co-encapsulated in the gel-in-gel HIPE after extraction using n-Hexanes.



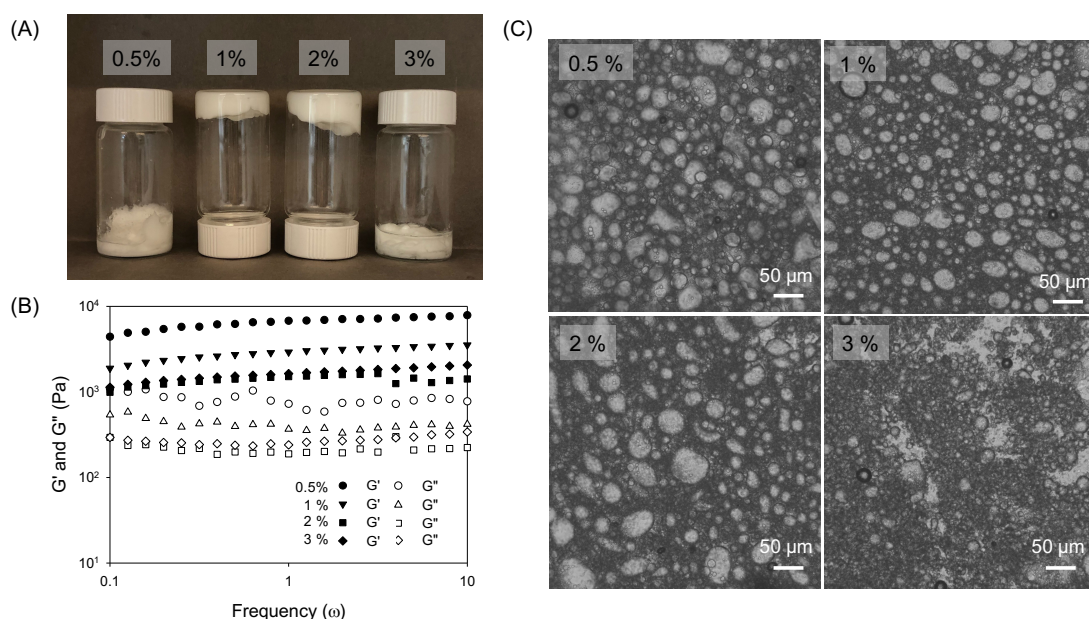

**Figure S14.** O-HIPEs featuring different GMO concentrations in the external phase. (A) Images and (B) rheological measurements of O-HIPEs prepared with different GMO concentrations. (C) The optical microscopy showing microstructure of O-HIPEs with different GMO concentrations.

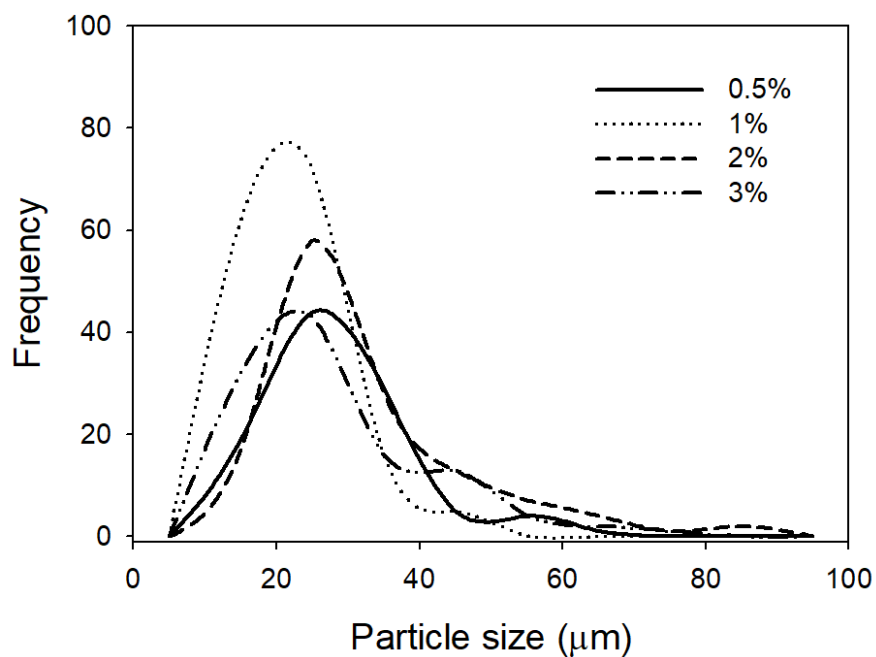

**Figure S15.** Particle size distribution of O-HIPEs made with 3 wt% beeswax and different GMO concentrations (0.5- 3%) in the external phase at internal volume fractions of 0.75.

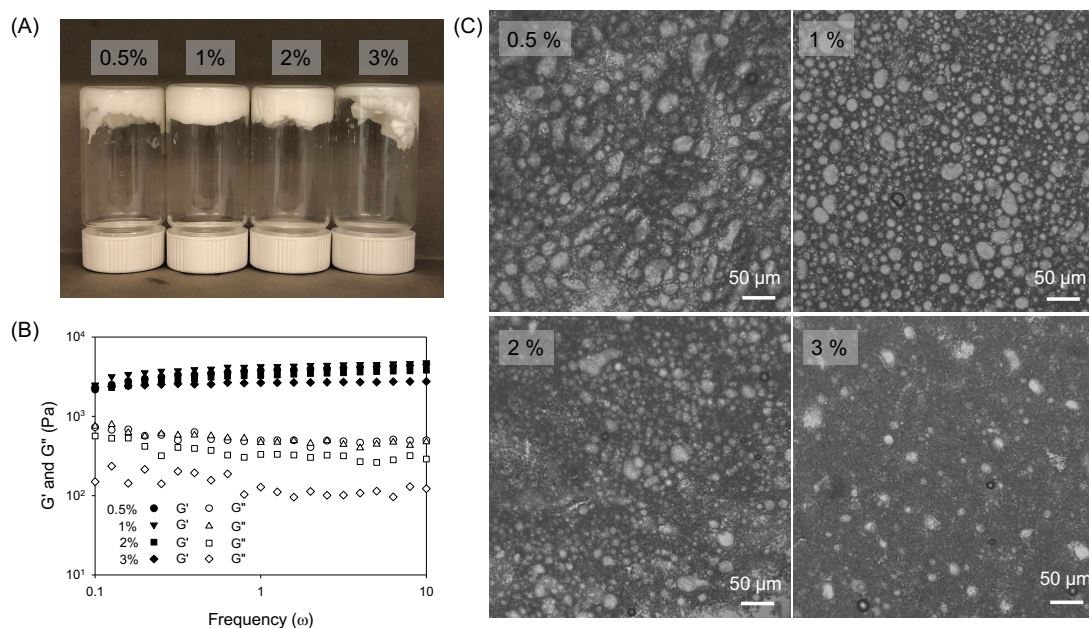

**Figure S16.** Gel-in-gel ( $\iota$ -carrageenan) HIPEs featuring different GMO concentrations. (A) Images and (B) rheological measurements of gel-in-gel ( $\iota$ -carrageenan) HIPEs prepared with different GMO concentrations. (C) The optical microscopy showing microstructure of gel-in-gel ( $\iota$ -carrageenan) HIPEs with different GMO concentrations.

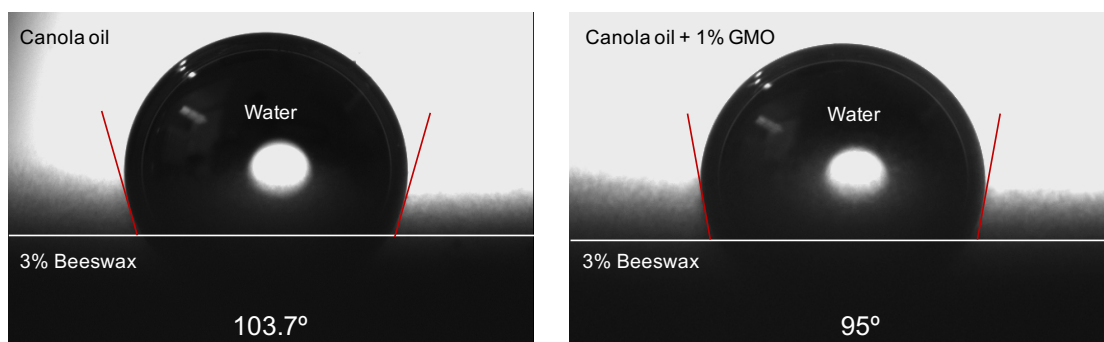

**Figure S17.** Three phase contact angle of water on 3% beeswax oleogel film immersed in either canola oil or canola oil- GMO mixture.

# Tables

**Table S1.** Particle size of HIPEs stabilized by solely 1 wt% GMO, solely 3 wt% beeswax, and a combination of 1 wt% GMO + 3 wt% beeswax made at internal volume fractions of 0.75.

| HIPE type     | Emulsion type | Particle Size ( $\mu\text{m}$ ) |
|---------------|---------------|---------------------------------|
| GMO           | O/W           | N/A                             |
| Beeswax       | W/O           | $28.86 \pm 11.33^a$             |
| GMO + Beeswax | W/O           | $17.59 \pm 6.18^a$              |

**Table S2.** Particle size of O-HIPEs made from different internal phase volume ratios.

|                                 | Internal phase volume ratio ( $\Phi$ ) |                     |                     |                     |
|---------------------------------|----------------------------------------|---------------------|---------------------|---------------------|
|                                 | 0.70                                   | 0.75                | 0.80                | 0.85                |
| Particle Size ( $\mu\text{m}$ ) | $27.16 \pm 13.41^a$                    | $25.78 \pm 11.22^a$ | $40.42 \pm 14.77^b$ | $45.77 \pm 21.01^b$ |

**Table S3.** Particle size of O-HIPEs made from different beeswax concentrations.

|                                 | Beeswax concentration (wt%) |                     |                    |                    |                   |
|---------------------------------|-----------------------------|---------------------|--------------------|--------------------|-------------------|
|                                 | 0.5                         | 1                   | 3                  | 5                  | 10                |
| Particle Size ( $\mu\text{m}$ ) | $105.25 \pm 38.34^a$        | $59.74 \pm 23.68^b$ | $16.50 \pm 6.42^c$ | $21.90 \pm 7.72^d$ | $5.75 \pm 1.62^e$ |

**Table S4.** Particle size of gel-in-gel HIPEs made from different carrageenans in the internal phase.

|                                 | Internal Phase (Carrageenan) |                     |                     |
|---------------------------------|------------------------------|---------------------|---------------------|
|                                 | $\kappa$ -                   | $\iota$ -           | $\lambda$ -         |
| Particle Size ( $\mu\text{m}$ ) | $34.90 \pm 11.40^a$          | $27.18 \pm 12.95^b$ | $45.61 \pm 25.72^c$ |

**Table S5.** EDS elemental analysis of carbon, oxygen, and sulfur from the cryo-SEM.

| Element  | Internal Phase (Atomic %) |               |              |                | External Phase (Atomic %) |               |              |                |
|----------|---------------------------|---------------|--------------|----------------|---------------------------|---------------|--------------|----------------|
|          | Water                     | $\kappa$ -car | $\iota$ -car | $\lambda$ -car | Water                     | $\kappa$ -car | $\iota$ -car | $\lambda$ -car |
| <b>C</b> | 2.77                      | 2.27          | 5.62         | 80.37          | 89.19                     | 79.99         | 83.28        | 89.32          |
| <b>O</b> | 97.23                     | 97.30         | 94.21        | 18.12          | 10.81                     | 19.70         | 15.94        | 10.68          |
| <b>S</b> | -                         | -             | -            | 0.58           | -                         | -             | -            | -              |
